# Supplementary material
Source: PubMed Central journal article supplement (PMC4221637)
Supplement: NIHMS622929-supplement-1.pdf [file NIHMS622929-supplement-1.pdf]

## Supplementary Information

### Self-assembled micellar nanocomplexes comprising green tea catechin derivatives and protein drugs for cancer therapy

Joo Eun Chung<sup>†\*</sup>, Susi Tan<sup>†</sup>, Shu Jun Gao, Nunnarpas Yongvongsoontorn, Soon Hee Kim, Jeong Heon Lee, Hak Soo Choi, Hirohisa Yano, Lang Zhuo, Motoichi Kurisawa\* and Jackie Y. Ying

<sup>†</sup>These authors contributed equally to this work

\*e-mail: jechung@ibn.a-star.edu.sg; mkurisawa@ibn.a-star.edu.sg

#### 1. Synthesis of oligomerized EGCG (OEGCG)

OEGCG was synthesized by the coupling of EGCGs through an ethyl (CH<sub>3</sub>-CH) bridge in the presence of acetaldehyde (Fig. S1a). Studies have shown that the condensation of (+)-catechin or (-)-epicatechin in the presence of acetaldehyde gave the condensed A rings of catechins through the CH<sub>3</sub>-CH bridges linked at C6-C6, C8-C8 and C6-C8 (R and S) bonds (Saucier, C., Guerra, C., Pianet, I., Laguerre, M. & Glories, Y. (+)-Catechin-acetaldehyde condensation products in relation to wine-ageing. *Phytochemistry* **46**, 229-234 (1997)).

To synthesize OEGCG, EGCG (Kurita Ltd., Japan) (1 g) was dissolved in a mixture of acetic acid, water and dimethyl sulfoxide (DMSO). The reaction was initiated with the addition of acetaldehyde (7.2 ml), and was conducted at 20 °C (pH 2) under a nitrogen atmosphere for 48 h. The resulting products were dialyzed (molecular weight cut-off (MWCO) = 2000) and

lyophilized to give OEGCG.

## 2. NMR analysis of OEGCG (DMSO-*d*<sub>6</sub>):

<sup>1</sup>H and <sup>13</sup>C NMR analysis of the product revealed the disappearance of H6 and H8, as well as the creation of the methyl and methine carbons of the CH<sub>3</sub>-CH bridge, respectively, demonstrating the condensation of EGCG linked through a CH<sub>3</sub>-CH bridge at the C6 and C8 position of the A ring.

**<sup>1</sup>H NMR:** δ 1.3-1.7 (CHCH<sub>3</sub>), 2.8 (H4<sub>β</sub> of C ring), 3.1 (H4<sub>α</sub> of C ring), 5.0 (H2 of C ring), 5.4 (H3 of C ring), 6.5 (H2'' and 6'' of D ring), 6.8 (H2' and 6' of B ring).

**<sup>13</sup>C NMR:** δ 20.7 (CHCH<sub>3</sub>), 26.5 (CHCH<sub>3</sub>), 30.7 (C4 of C ring), 67.7 (C3 of C ring), 76.7 (C2 of C ring), 90.2-95.7 (C6 and 8 of A ring), 100.5 (C4a), 106.3 (C2' and 6' of B ring), 109.6 (C2'' and 6'' of D ring), 119.3 (C1'' of D ring), 128.5 (C4' of B ring), 132.8 (C1' of B ring), 138.7 (C4'' of D ring), 145.4-145.8 (C3' and 5' of B ring and C3'' and 5'' of D ring), 151.4-152.1 (C5 and 7 of A ring and C8a), 165.3 (COO).

## 3. Mass spectra of OEGCG

Matrix-assisted laser desorption ionization time-of-flight mass spectrometry (MALDI-TOF MS) detected the presence of hexamer with a series of peaks separated by the regular incremental mass of an EGCG unit linked by the CH<sub>3</sub>-CH bridge (*m/z* = 485 of EGCG-CHCH<sub>3</sub> fragment and *m/z* = 511 of CH<sub>3</sub>CH-EGCG-CHCH<sub>3</sub> fragment) (Fig. S2a). MALDI-TOF/TOF analysis further proved that the parent peaks were comprised of the same fragments of EGCG molecule linked with CH<sub>3</sub>-CH (*m/z* = 485 and *m/z* = 511) (Fig. S2b).

#### 4. Synthesis of poly(ethylene glycol)-EGCG (PEG-EGCG)

PEG-EGCG was synthesized by conjugation between a terminal aldehyde group of PEG-CHO and the A ring of EGCG using the same reaction for OEGCG synthesis (Fig. S1b). The aldehyde-terminated PEG (PEG-CHO, Mw 5000, NOF Co., Japan) (0.35 g) and EGCG (0.65 g) were separately dissolved in a mixture of acetic acid, water and DMSO. The reaction was initiated with the dropwise addition of the PEG-CHO solution, and was conducted at 20 °C (pH 2) under a nitrogen atmosphere for 48 h. The resulting products were dialyzed (MWCO = 3500) and lyophilized to give PEG-EGCG.

#### 5. NMR analysis of PEG-EGCG (DMSO-d<sub>6</sub>)

The linkage between PEG and EGCG was detected by <sup>13</sup>C NMR analysis.

<sup>1</sup>H NMR: δ 2.7 (H4<sub>β</sub> of C ring), 2.9 (H4<sub>α</sub> of C ring), 3.4-3.7 (CH<sub>3</sub>O and CH<sub>2</sub>CH<sub>2</sub>O of PEG), 5.0 (H2 of C ring), 5.4 (H3 of C ring), 5.8-5.9 (H6 and 8 of A ring), 6.4 (H2'' and 6'' of D ring), 6.8 (H2' and 6' of B ring).

<sup>13</sup>C NMR: δ 26.4 (CH of PEG linked to EGCG), 30.6 (C4 of C ring), 57.9 (CH<sub>3</sub>O of PEG), 69.7-71.2 (CH<sub>2</sub>CH<sub>2</sub>O of PEG), 76.3 (C3 of C ring), 86.3 (C2 of C ring), 94.2-95.3 (C6 and 8 of A ring), 97.4 (C4a), 105.6 (C2' and 6' of B ring), 108.7 (C2'' and 6'' of D ring), 119.3 (C1'' of D ring), 128.5 (C4' of B ring), 132.2 (C1' of B ring), 138.4 (C4'' of D ring), 145.3-145.5 (C3' and 5' of B ring and C3'' and 5'' of D ring), 153.8-156.4 (C5 and 7 of A ring and C8a), 165.2 (COO).

#### 6. Mass spectra of PEG-EGCG

Electrospray ionization time-of-flight mass spectrometry (ESI-TOF MS) was conducted

on PEG (Fig. S3a) and PEG-EGCG (Fig. S3b). The m/z difference between two clusters of peaks was observed as a PEG repeating unit of 44 for both PEG and PEG-EGCG, taking into account of a charge of +5 calculated from 0.2 m/z difference between each peak (i.e.  $(1037.26 - 1028.43) \times 5 = 44.15$ ). However, the peaks of PEG-EGCG shifted higher with molecular weight of two EGCG (i.e.  $(1211.09 - 1028.65) \times 5 = 912.36$ ), as compared to those of PEG, demonstrating that the product had two molecules of EGCG bound to an end of the PEG chain.

## **7. Selective cancer cell growth inhibitory effect of OEGCG and PEG-EGCG**

Cytotoxicities of EGCG derivatives and intact EGCG were examined on a human normal mammary epithelial cells (HMECs, Cambrex, USA). Cells were plated ( $1 \times 10^4$  cells in mammary epithelial growth medium/well) in quintuplicate and octuplicate for samples and controls, respectively, in 96-well microplates, and allowed to adhere overnight. After the cells were treated with different concentrations of EGCG, OEGCG and PEG-EGCG for 3 days, the cell viability was estimated using Alamar Blue. PEG-EGCG did not affect cell growth in the range of concentrations tested. Like EGCG, OEGCG showed a low cytotoxicity (Fig. S4a).

Cancer cell growth inhibitory effect of EGCG derivatives was examined on BT-474 (HER2-overexpressing human breast cancer cell line). Cells were plated ( $1 \times 10^4$  cells in RPMI 1640/well), and treated in the same way as mentioned above. OEGCG and PEG-EGCG both inhibited cancer cell growth in a concentration-dependent manner (Fig. S4b).

## **8. $\zeta$ Potential of Herceptin-loaded MNC**

$\zeta$  potential was analysed at each step of these two-step sequential self-assemblies (Fig. S6).  $\zeta$  potential was measured using a zeta potential analyser (Brookhaven Instruments Co.). The

surface charge of the Herceptin/OEGCG complexes was observed to be positive. After adding the required amount of PEG-EGCG to the Herceptin/OEGCG complexes, the surface charge of the resulting complex decreased to a value close to that of PEG. This finding confirmed that the MNC was constructed with a PEG outer shell that surrounded the Herceptin/OEGCG core.

## 9. Protection from proteolysis

To investigate the protection of protein by this system, the MNC loaded with a fluorescence-labeled protein (fluorescein isothiocyanate-bovine serum albumin (FITC-BSA) was subjected to a protease (proteinase K, 0.05 mg ml<sup>-1</sup>), and the fluorescence intensity increase due to protein degradation was monitored (Fig. S9). A fluorescence spectrophotometer was employed for this study (Hitachi, Japan,  $\lambda_{\text{ex}} = 490$  nm and  $\lambda_{\text{em}} = 530$  nm). The fluorescence intensity of free FITC-BSA increased significantly with time, indicating the progressive protein degradation by proteinase K. In contrast, the fluorescence intensity of FITC-BSA loaded in the MNC increased very slowly, indicating that the protein was safely protected from proteolysis by this MNC system.

## 10. *In vitro* synergism study of Herceptin-MNC

The quantitative analysis of the combined therapeutic effects of Herceptin and the carrier components in the Herceptin-MNC system was performed using the combination index (CI) theorem of Chou-Talalay, which offers quantitative definition of the additive effect (CI = 1), synergism (CI < 1), and antagonism (CI > 1) in drug combinations (Chou, T.-C., *et al. Adv Enzyme Regul* **22**, 27-55 (1984)). The Chou-Talalay method has been widely used for dose effect analysis quantifying synergism/antagonism in drug combination (Chou, T.-C., *et al. J Natl*

*Cancer I* **86**, 1517-1524 (1994)). The general equation for the combination index  ${}^n(CI)_x$  for  $n$  drugs at  $x\%$  inhibition is described as,

$${}^n(CI)_x = \sum_{j=1}^n \frac{(D)_j}{(D_x)_j}$$

where  $(D)_j$  is the concentrations of  $n$  drugs used in combination to achieve  $x\%$  drug effect, and  $(D_x)_j$  is the concentrations of each drug alone to achieve the same effect. Based on this theory, the computer software CalcuSyn was developed for automated data analysis (Chou, T.-C., *et al. J Natl Cancer I* **86**, 1517-1524 (1994)).

Since Herceptin-MNC (Herceptin = 0.5 mg ml<sup>-1</sup>, OEGCG = 0.024 mg ml<sup>-1</sup>, PEG-EGCG = 0.26 mg ml<sup>-1</sup>) gave an inhibition effect of 0.52 on BT-474 cells (Fig. 4a), CI of three therapeutic components (Herceptin/OEGCG/PEG-EGCG) in the Herceptin-MNC was calculated by the following equation using the CalcuSyn software.

$$CI = \frac{(D)_{Herceptin}}{(D_{52})_{Herceptin}} + \frac{(D)_{OEGCG}}{(D_{52})_{OEGCG}} + \frac{(D)_{PEG-EGCG}}{(D_{52})_{PEG-EGCG}}$$

where  $(D)_{Herceptin}$ ,  $(D)_{OEGCG}$  and  $(D)_{PEG-EGCG}$  are the concentrations of Herceptin, OEGCG and PEG-EGCG used in combination to achieve 52% drug effect.  $(D_{52})_{Herceptin}$ ,  $(D_{52})_{OEGCG}$  and  $(D_{52})_{PEG-EGCG}$  are the concentrations for Herceptin, OEGCG and PEG-EGCG, respectively, to achieve the same effect independently. Each value was computed from the dose effect curve that was generated by the CalcuSyn. The resulting CI of Herceptin-MNC was 0.93 (CI < 1), indicating the synergistic therapeutic effect between Herceptin and the carrier components.

## 11. Toxicity of Herceptin and Herceptin-MNC

The change of each organ in mice was determined microscopically 35 days after the

administration of Herceptin (2.5 mg kg<sup>-1</sup>) or Herceptin-MNC in an equivalent amount to Herceptin (Table S1).

## 12. Anticancer effects of IFN-MNC *in vitro* and *in vivo*

HAK-1B (human liver cancer cell line) was kindly provided from Prof. Hirohisa Yano (Kurume University, Japan). HAK-1B was cultured in DMEM with 5% FBS and 100 units ml<sup>-1</sup> of penicillin and streptomycin. Inhibitory effect of IFN-MNC in HAK-1B proliferation was analysed in the same way mentioned in the main text with following samples: IFN (0.020 mg ml<sup>-1</sup>), IFN-MNC (IFN/OEGCG/PEG-EGCG = 0.020/0.0049/0.78 mg ml<sup>-1</sup>), BSA-MNC (with the equivalents), the mixture of BSA-MNC and IFN (with the equivalents), BSA (with the equivalent), OEGCG (with the equivalent), and PEG-EGCG (with the equivalent).

To analyse anticancer effect of IFN-MNC in tumour-xenografted nude mice, CrTac:NCr-Foxn1nu female mice were inoculated s.c. with 1×10<sup>7</sup> HAK-1B cells suspended in 200 µl of PBS at the right flank. Once the tumours reached a volume of 360 mm<sup>3</sup>, 8-9 mice/group were randomly allocated for different treatment. Treatment, measurement and analysis were performed in the same way mentioned in the main text with following samples: PBS (vehicle control), free IFN, BSA-MNC, a sequential administration of BSA-MNC and IFN, and IFN-MNC in the same formulations as those employed in the *in vitro* experiments.

## 13. Bioconjugation of NIR fluorophores

Heptamethine near-infrared (NIR) fluorophore ZW800-1 was synthesized as previously reported (Choi, H.S., *et al. Angew Chem Int Ed Engl* **50**, 6258-6263 (2011)). Herceptin-ZW800-1 (HER-ZW) or interferon-ZW800-1 (IFN-ZW) was prepared in 0.1 M sodium phosphate buffer

(pH 8) by adding 5 equivalents of ZW800-1 to the Herceptin or IFN solution. To purify the reaction mixture, gel-filtration chromatography (GFC) was performed using Bio-Scale Mini Bio-Gel P-6 Desalting columns (Bio-Rad) with 0.05 M phosphate buffer as an eluent. The conjugated protein fractions were collected and concentrated using spin columns (Vivaspin 500, MWCO = 50,000). The conjugation ratio was estimated from the ratio of extinction coefficients between ZW800-1 ( $\epsilon_{772\text{ nm}} = 249,000\text{ M}^{-1}\text{ cm}^{-1}$ ) and Herceptin ( $\epsilon_{280\text{ nm}} = 225,000\text{ M}^{-1}\text{ cm}^{-1}$ ) or IFN ( $\epsilon_{280\text{ nm}} = 14,500\text{ M}^{-1}\text{ cm}^{-1}$ ) with correction for the 5% measured absorbance at 280 nm due to ZW800-1. Labeling ratio was  $\sim 1$  for HER-ZW and  $\sim 0.5$  for IFN-ZW conjugates, which was calculated by the following formula,  $(\text{Abs}_{772\text{ nm}}/\epsilon_{772\text{ nm}})/[(\text{Abs}_{280\text{ nm}} - 0.05\text{Abs}_{772\text{ nm}})/\epsilon_{280\text{ nm}}]$ . Absorbance and fluorescence emission spectra of fluorophore-conjugated proteins and protein-MNCs are shown in Fig. S14 and S16, respectively.

#### **14. Biodistribution and pharmacokinetics**

For tumour-bearing animals, the accumulation ratio of the tumour to normal organ/tissue was measured using a region of interest (ROI) over the tumour for fluorescence (FL) and a ROI over liver, kidney, spleen or skin for background (BG) after resection (Fig. 4e and Fig. S17). The blood half-life of proteins and protein-MNCs was compared in Fig. S15 and S18. At least five animals were analysed. Statistical analysis was performed using a one-way ANOVA, followed by Tukey's multiple comparisons test. The curve fitting was performed using Prism version 4.0a software (GraphPad, San Diego, CA).



## SUPPLEMENTARY TABLE

### Supplementary Table 1

**Table S1. Pathological findings after administration of Herceptin or Herceptin-MNC**

| Organs      | Herceptin | Herceptin-MNC |
|-------------|-----------|---------------|
| Brain       | N         | N             |
| Lung        | N         | N             |
| Heart       | N         | N             |
| Kidneys     | N         | N             |
| Liver       | N         | N             |
| Gallbladder | N         | N             |
| Spleen      | N         | N             |

N: Normal

# SUPPLEMENTARY FIGURES

## Supplementary Fig. 1

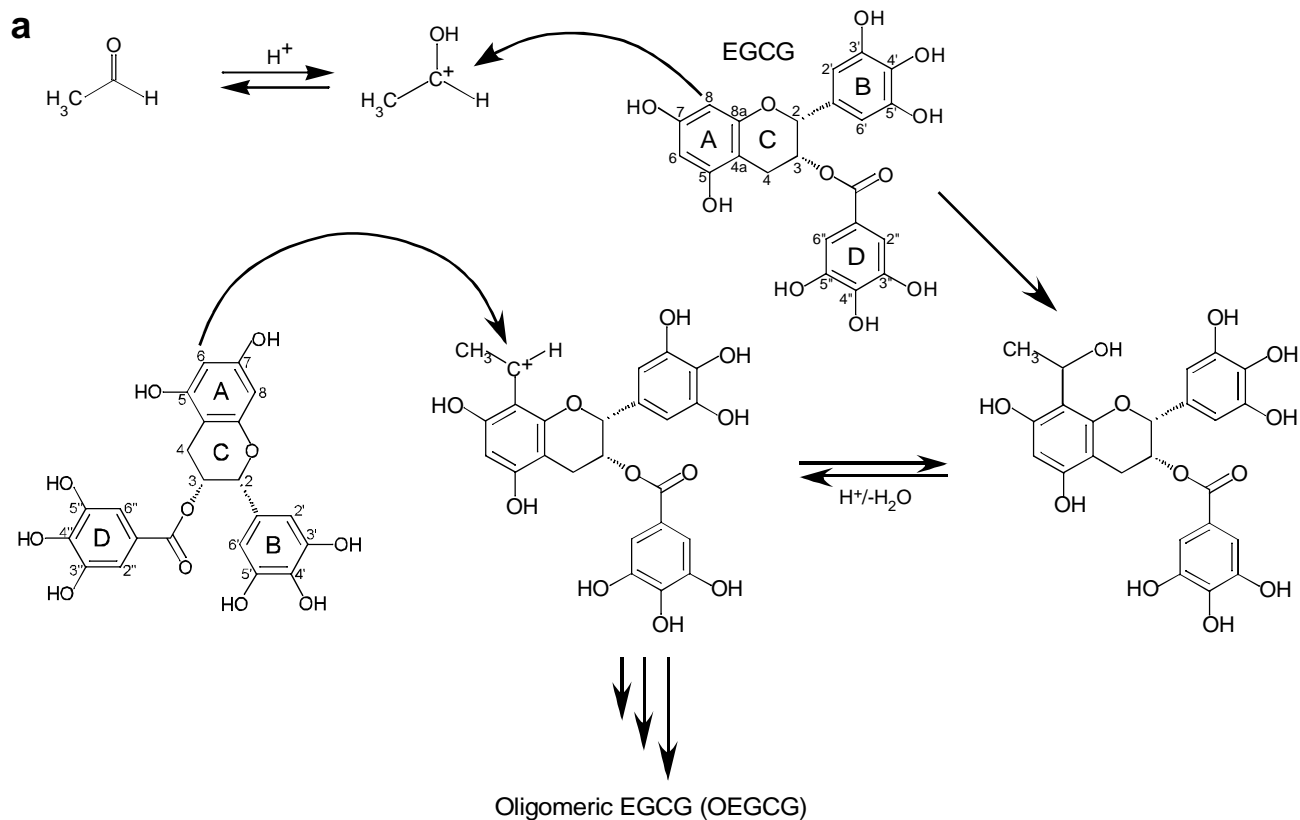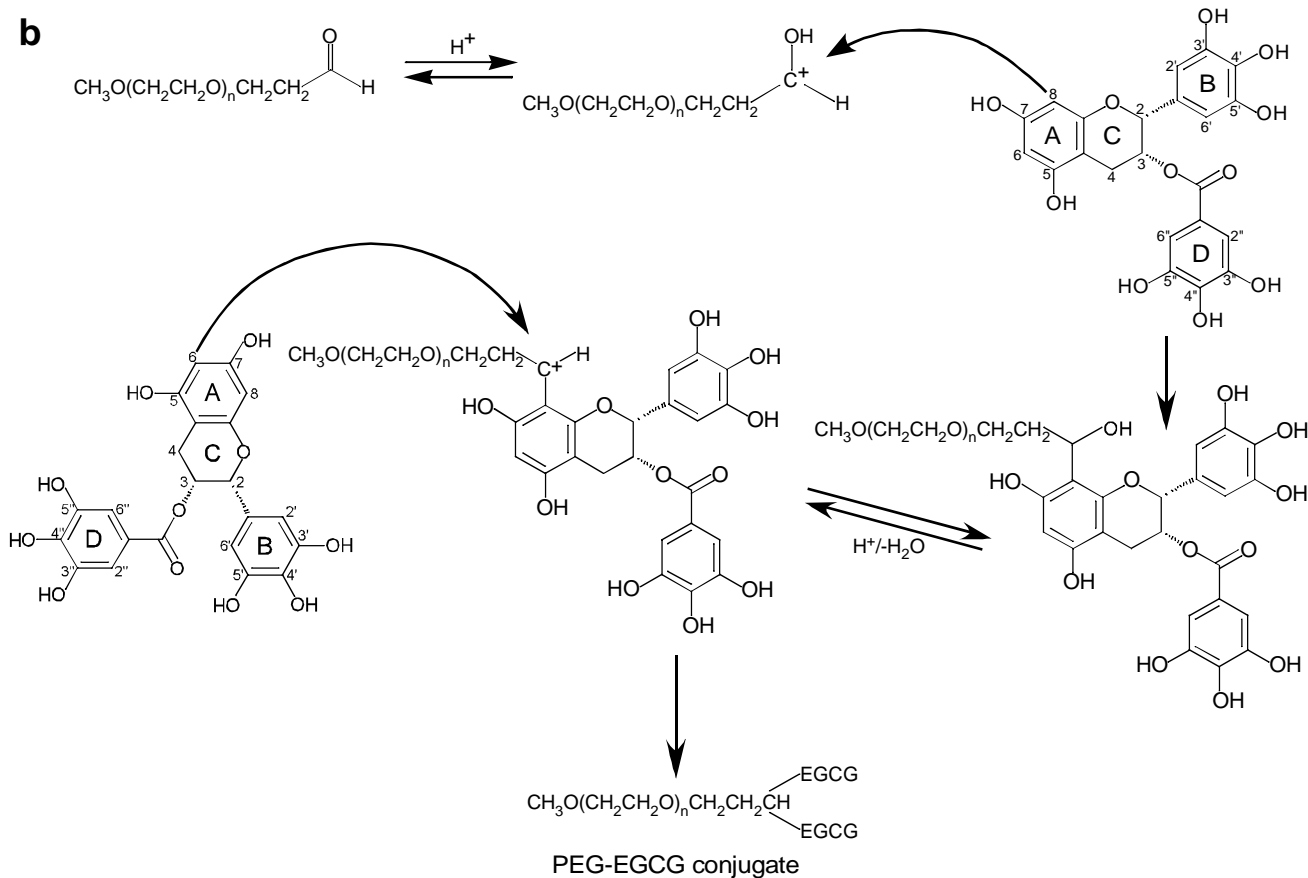

**Fig. S1 Synthesis of carrier components. Synthesis of a, OEGCG and b, PEG-EGCG.**

## Supplementary Fig. 2

a.

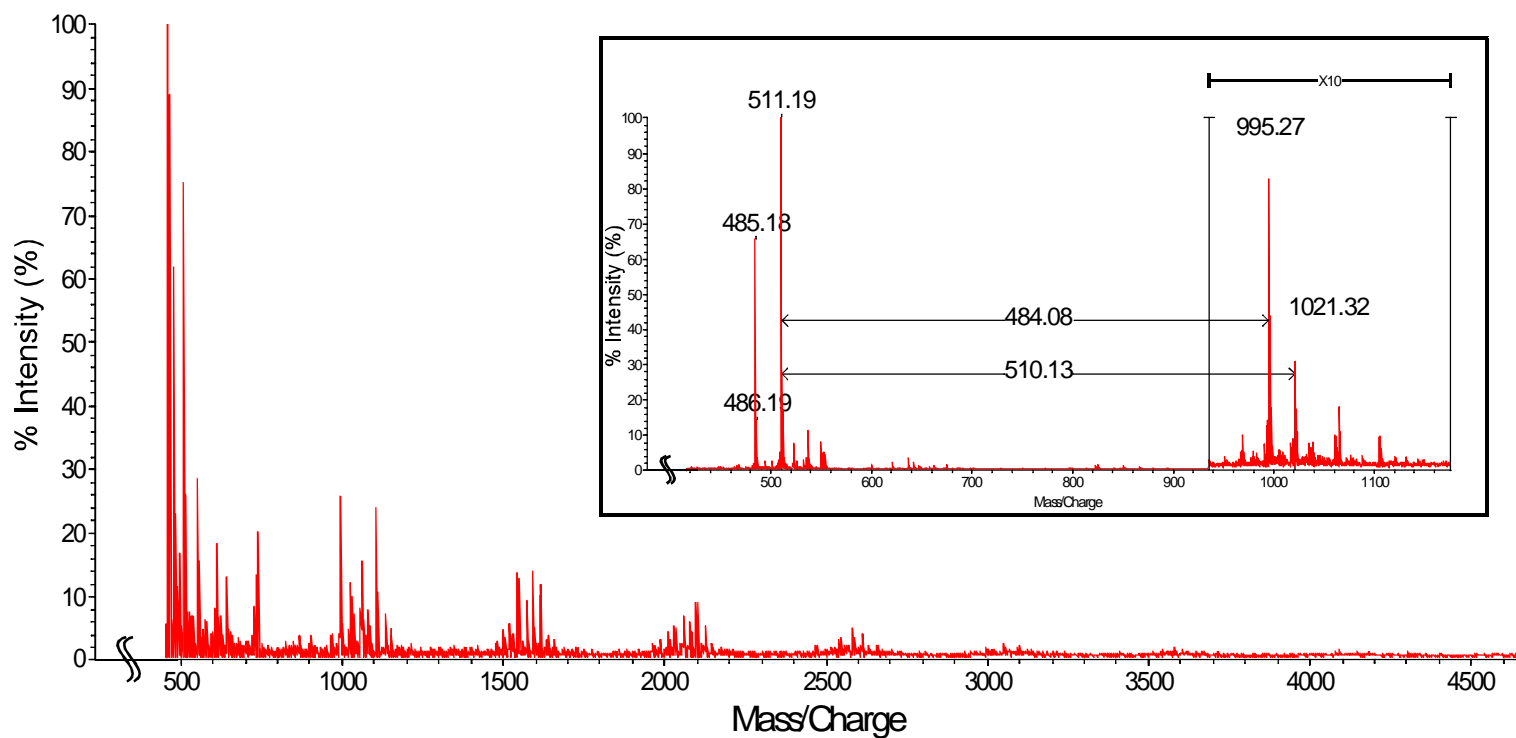

b.

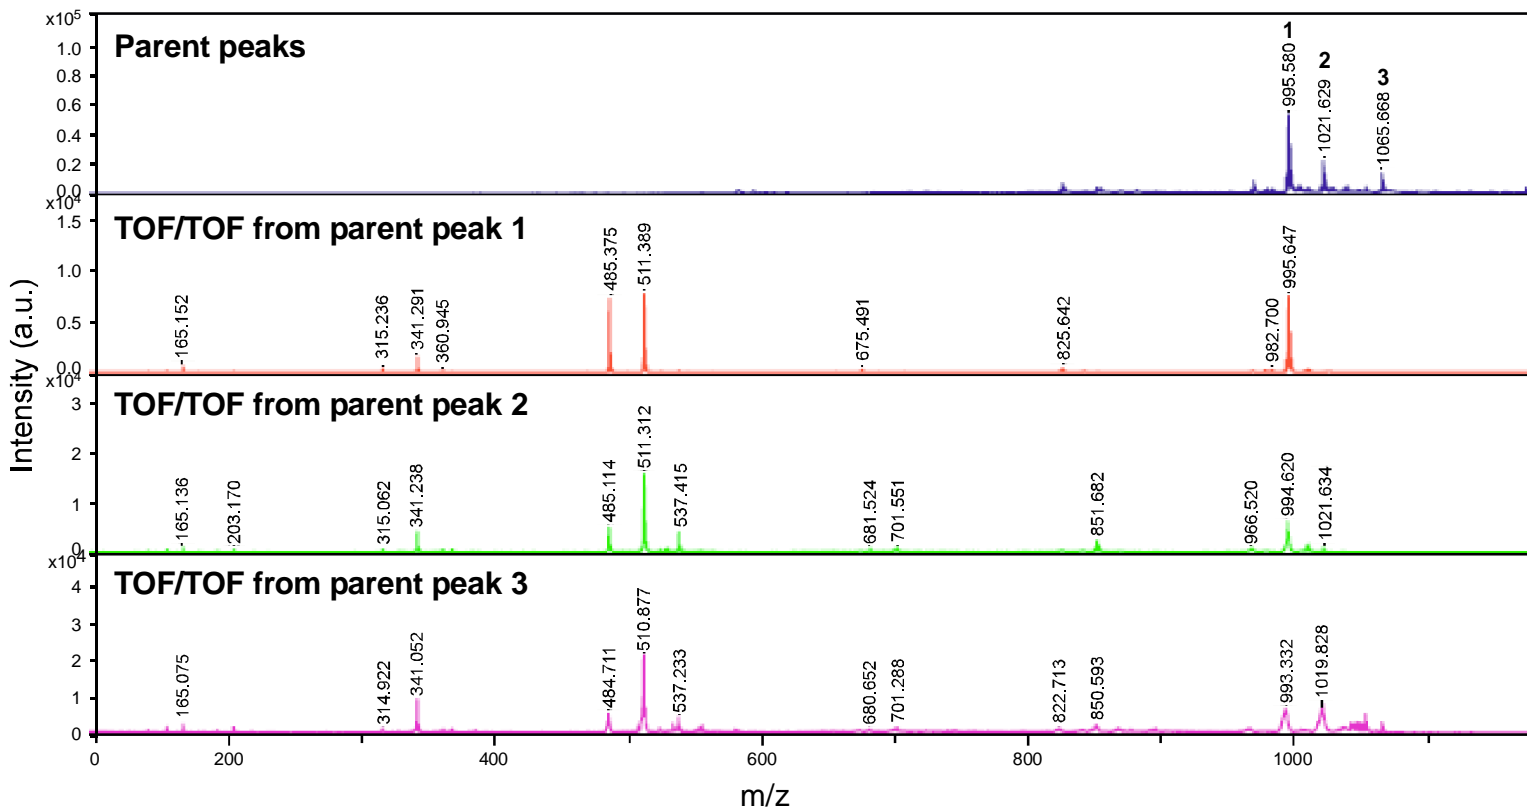

**Fig. S2** Mass spectra of OEGCG. **a**, MALDI-TOF mass spectrum of OEGCG. **b**, MALDI-TOF/TOF mass spectrum of OEGCG.

## Supplementary Fig. 3

**a**

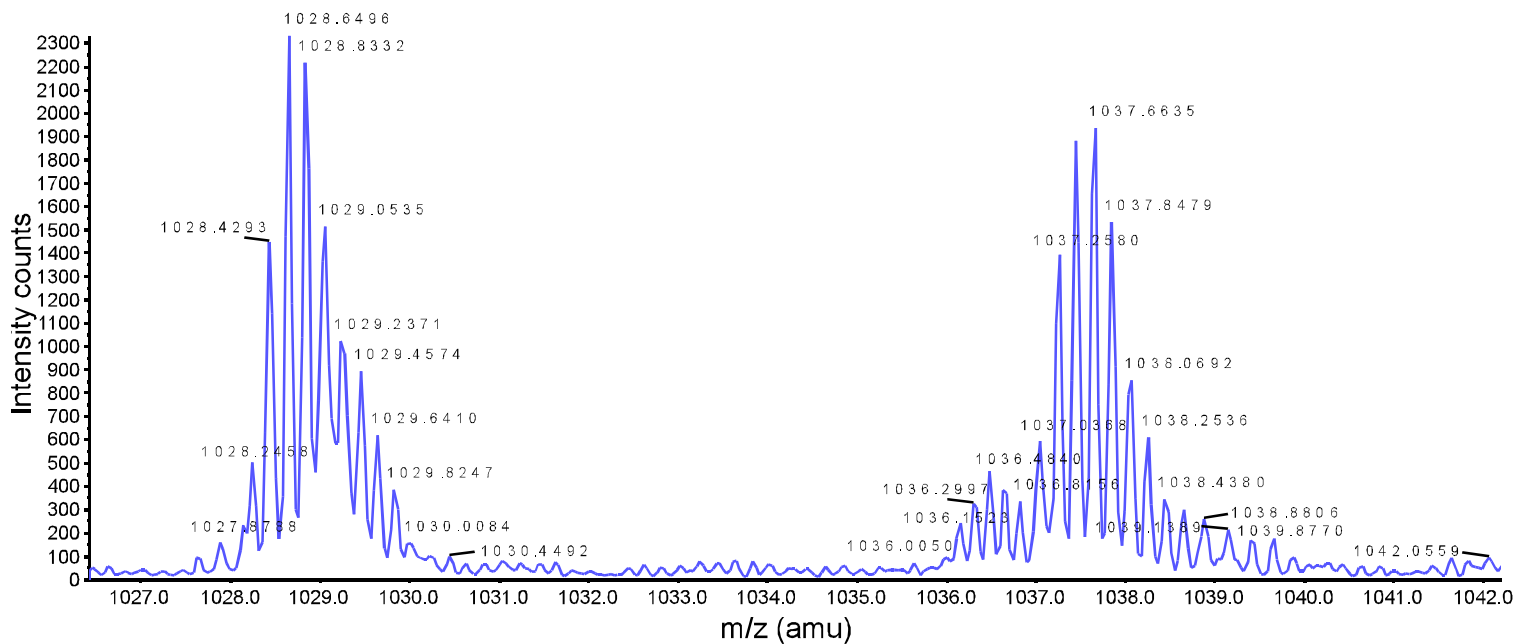

**b**

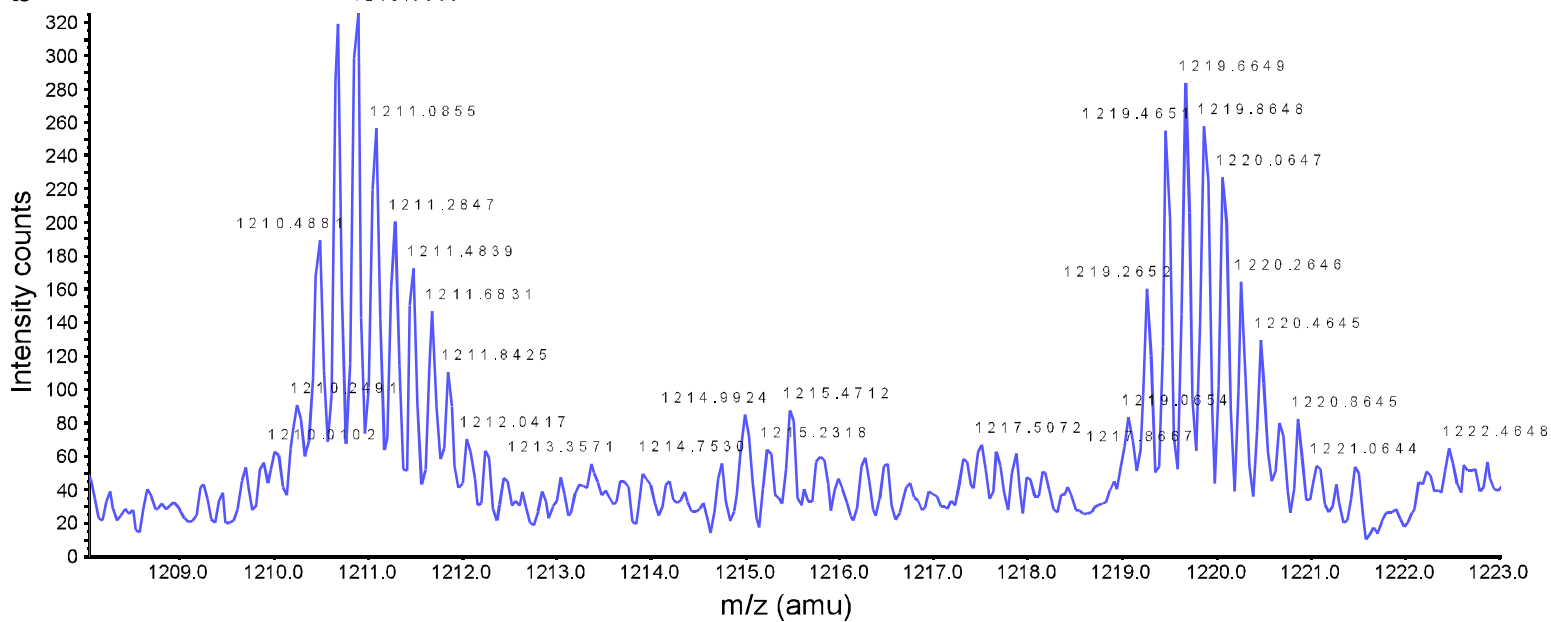

**Fig S3 ESI-TOF mass spectrum of PEG-EGCG. Zoom-in spectra of +5 charged fragments of a, PEG and b, PEG-EGCG.**

## Supplementary Fig. 4

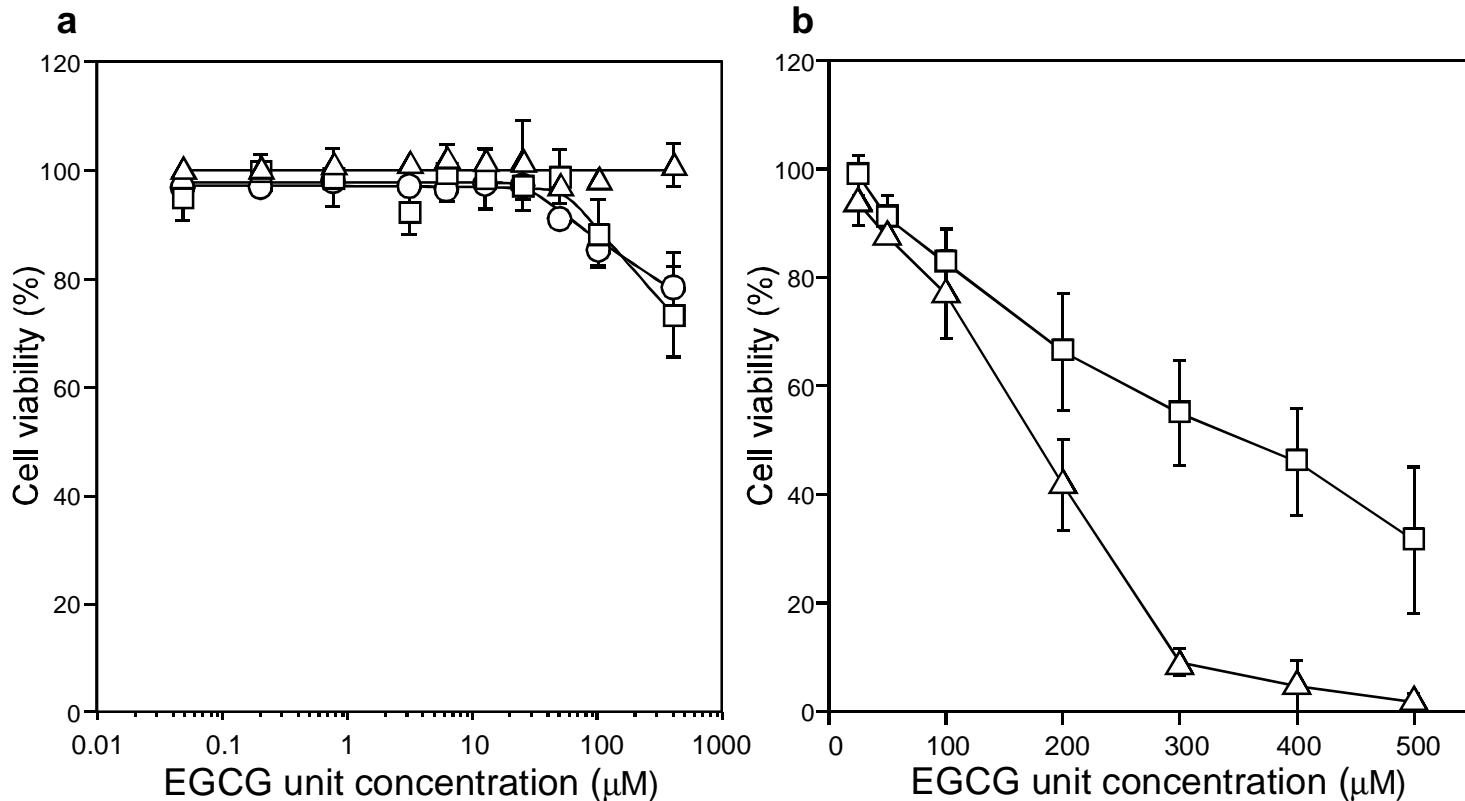

**Fig. S4 Cell growth inhibitory effect.** **a**, HMECs (human normal mammary epithelial cells) and **b**, BT-474 (HER2-overexpressing human breast cancer cell line) treated with EGCG (white circles), OEGCG (white squares) and PEG-EGCG (white triangles). The data points represent mean values and the bars represent s.d. (n = 5).

## Supplementary Fig. 5

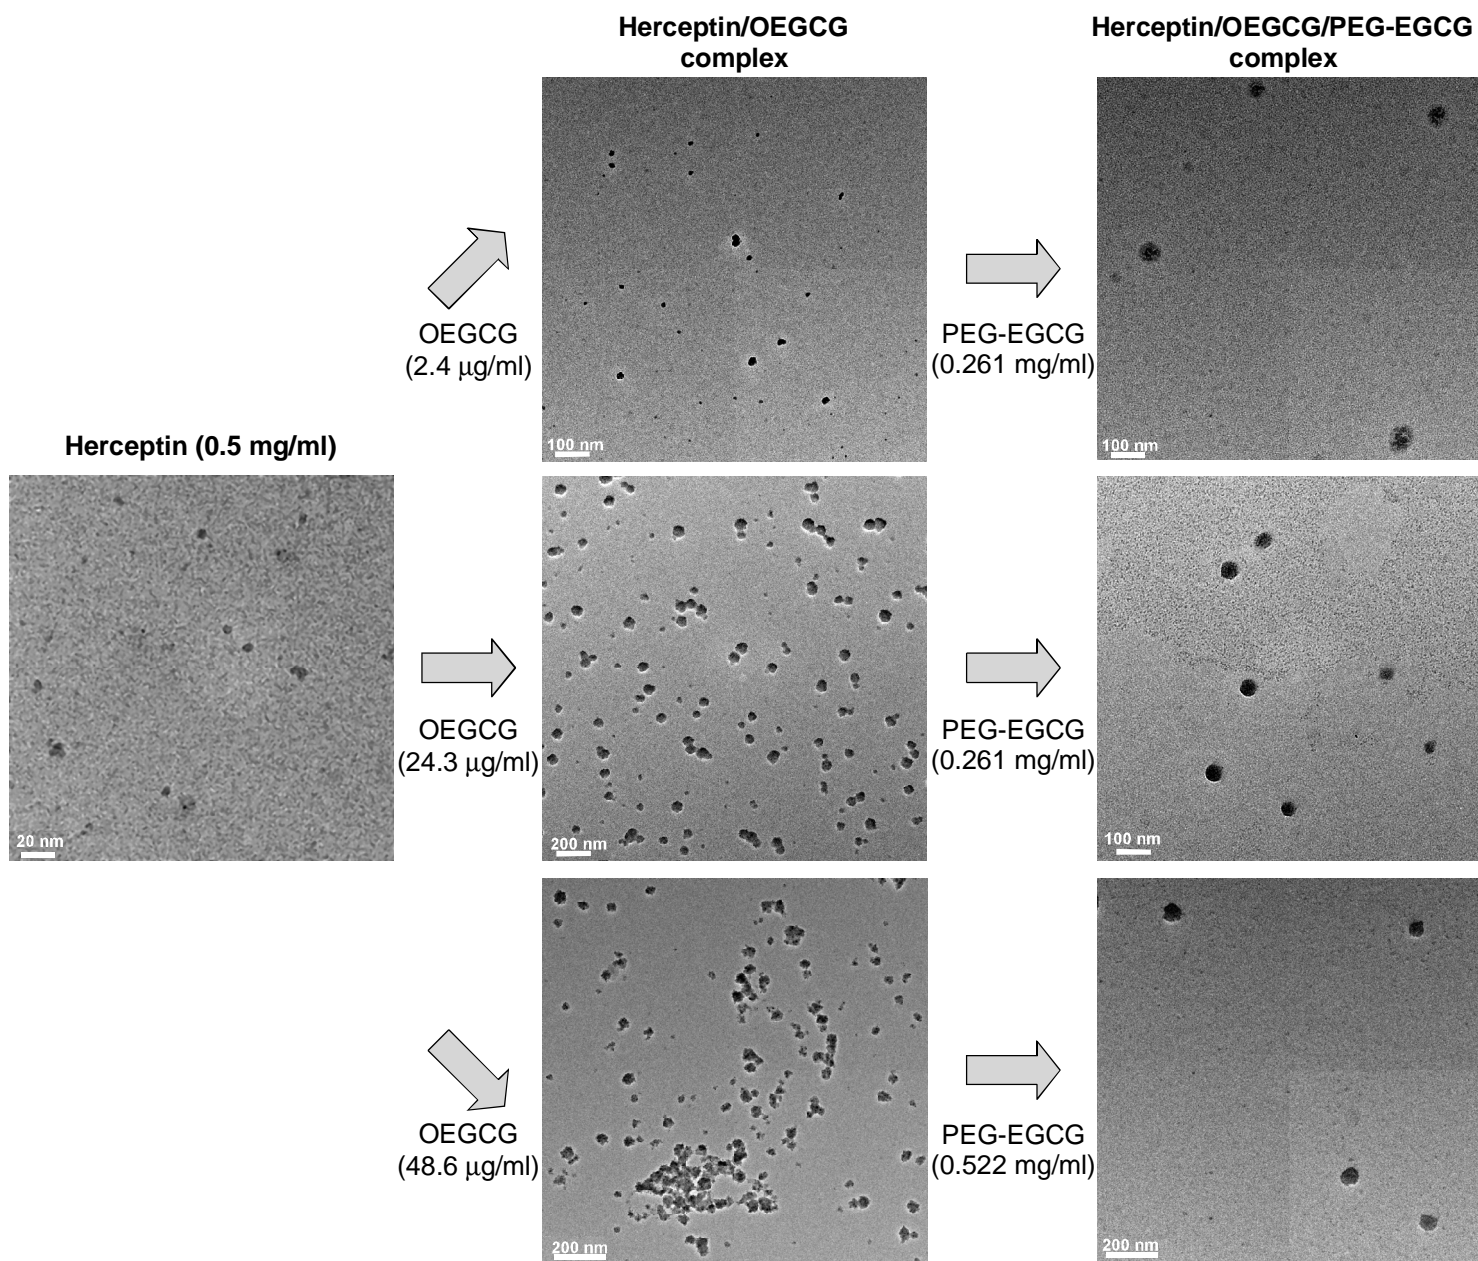

**Fig. S5 TEM images of complexes observed at each step of self-assembly, when the OEGCG concentration was varied.**

### Supplementary Fig. 6

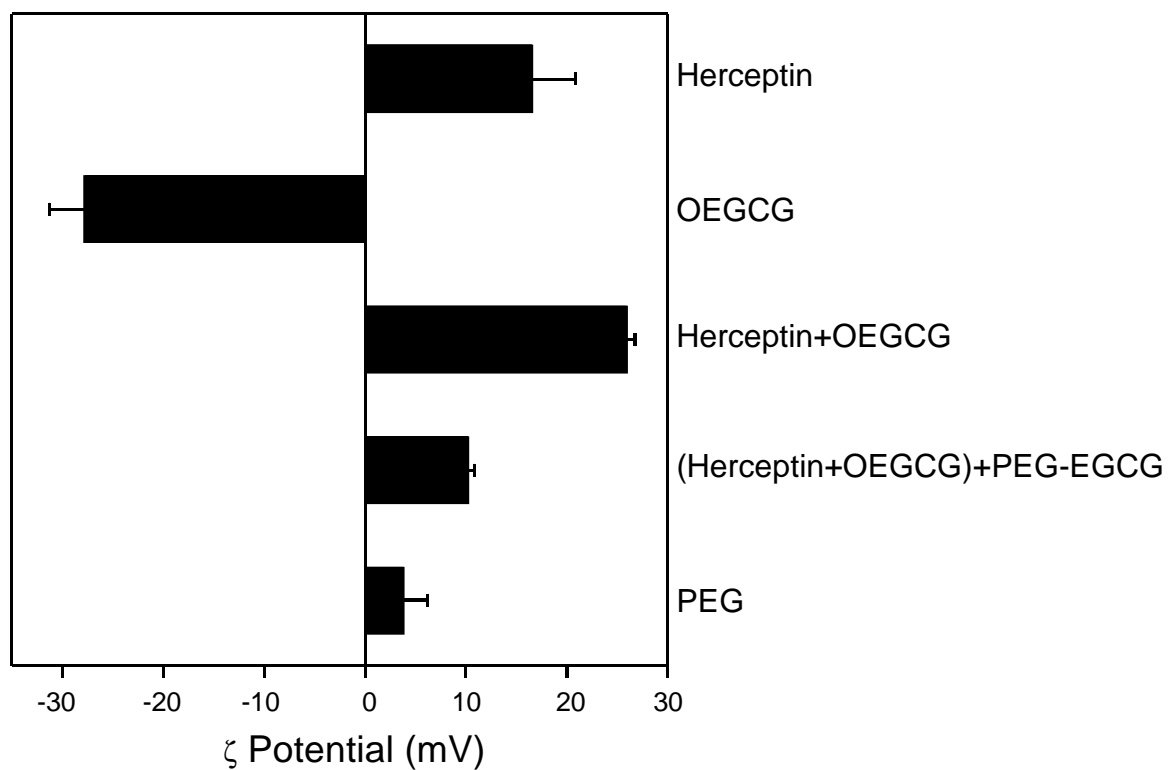

**Fig. S6 Surface charge of the complexes observed at each assembly step.** The results are reported as mean values and the bars represent s.d. (n = 5).

**Supplementary Fig. 7**

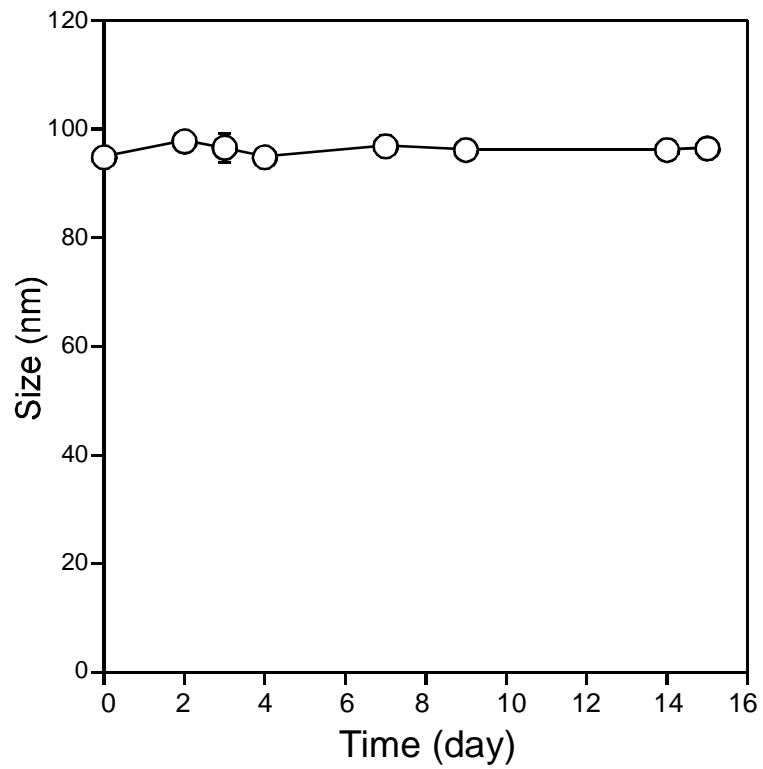

**Fig. S7 Integrity of the MNC in the presence of serum at 37°C.** The data points represent mean values and the bars represent s.d. (n = 3).



### Supplementary Fig. 8

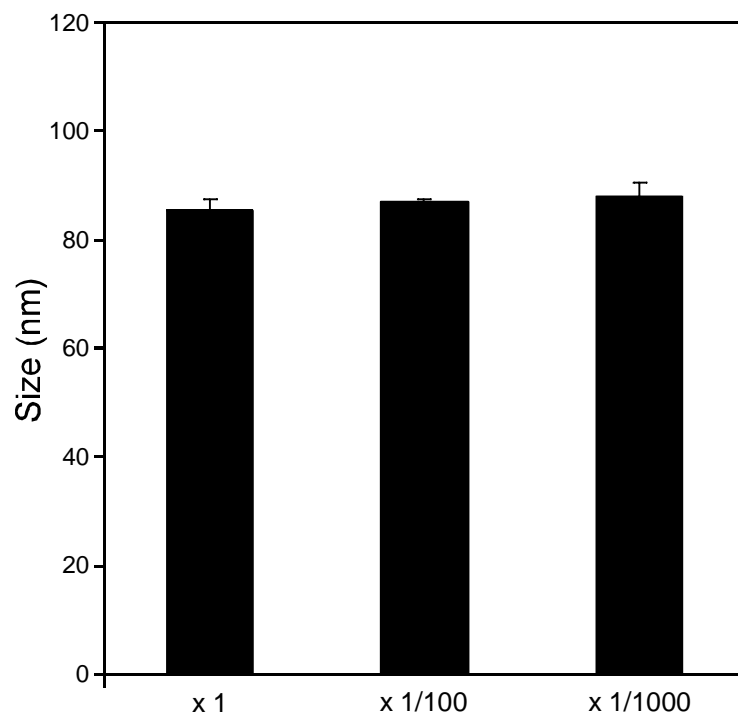

**Fig. S8 Integrity of the MNC in dilution.** The results are reported as mean values and the bars represent s.d. (n = 3).

### Supplementary Fig. 9

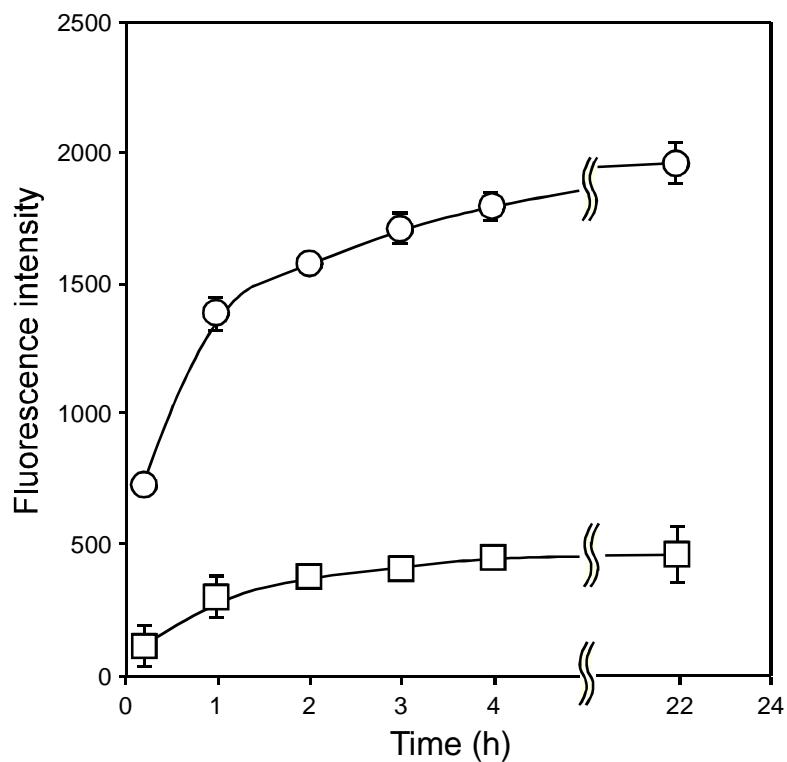

**Fig. S9 Protection against proteolysis by complexation.** Free FITC-BSA (white circles) and FITC-BSA loaded MNC (white squares) in the presence of proteinase K. The data points represent mean values and the bars represent s.d. (n = 3).

## Supplementary Fig. 10

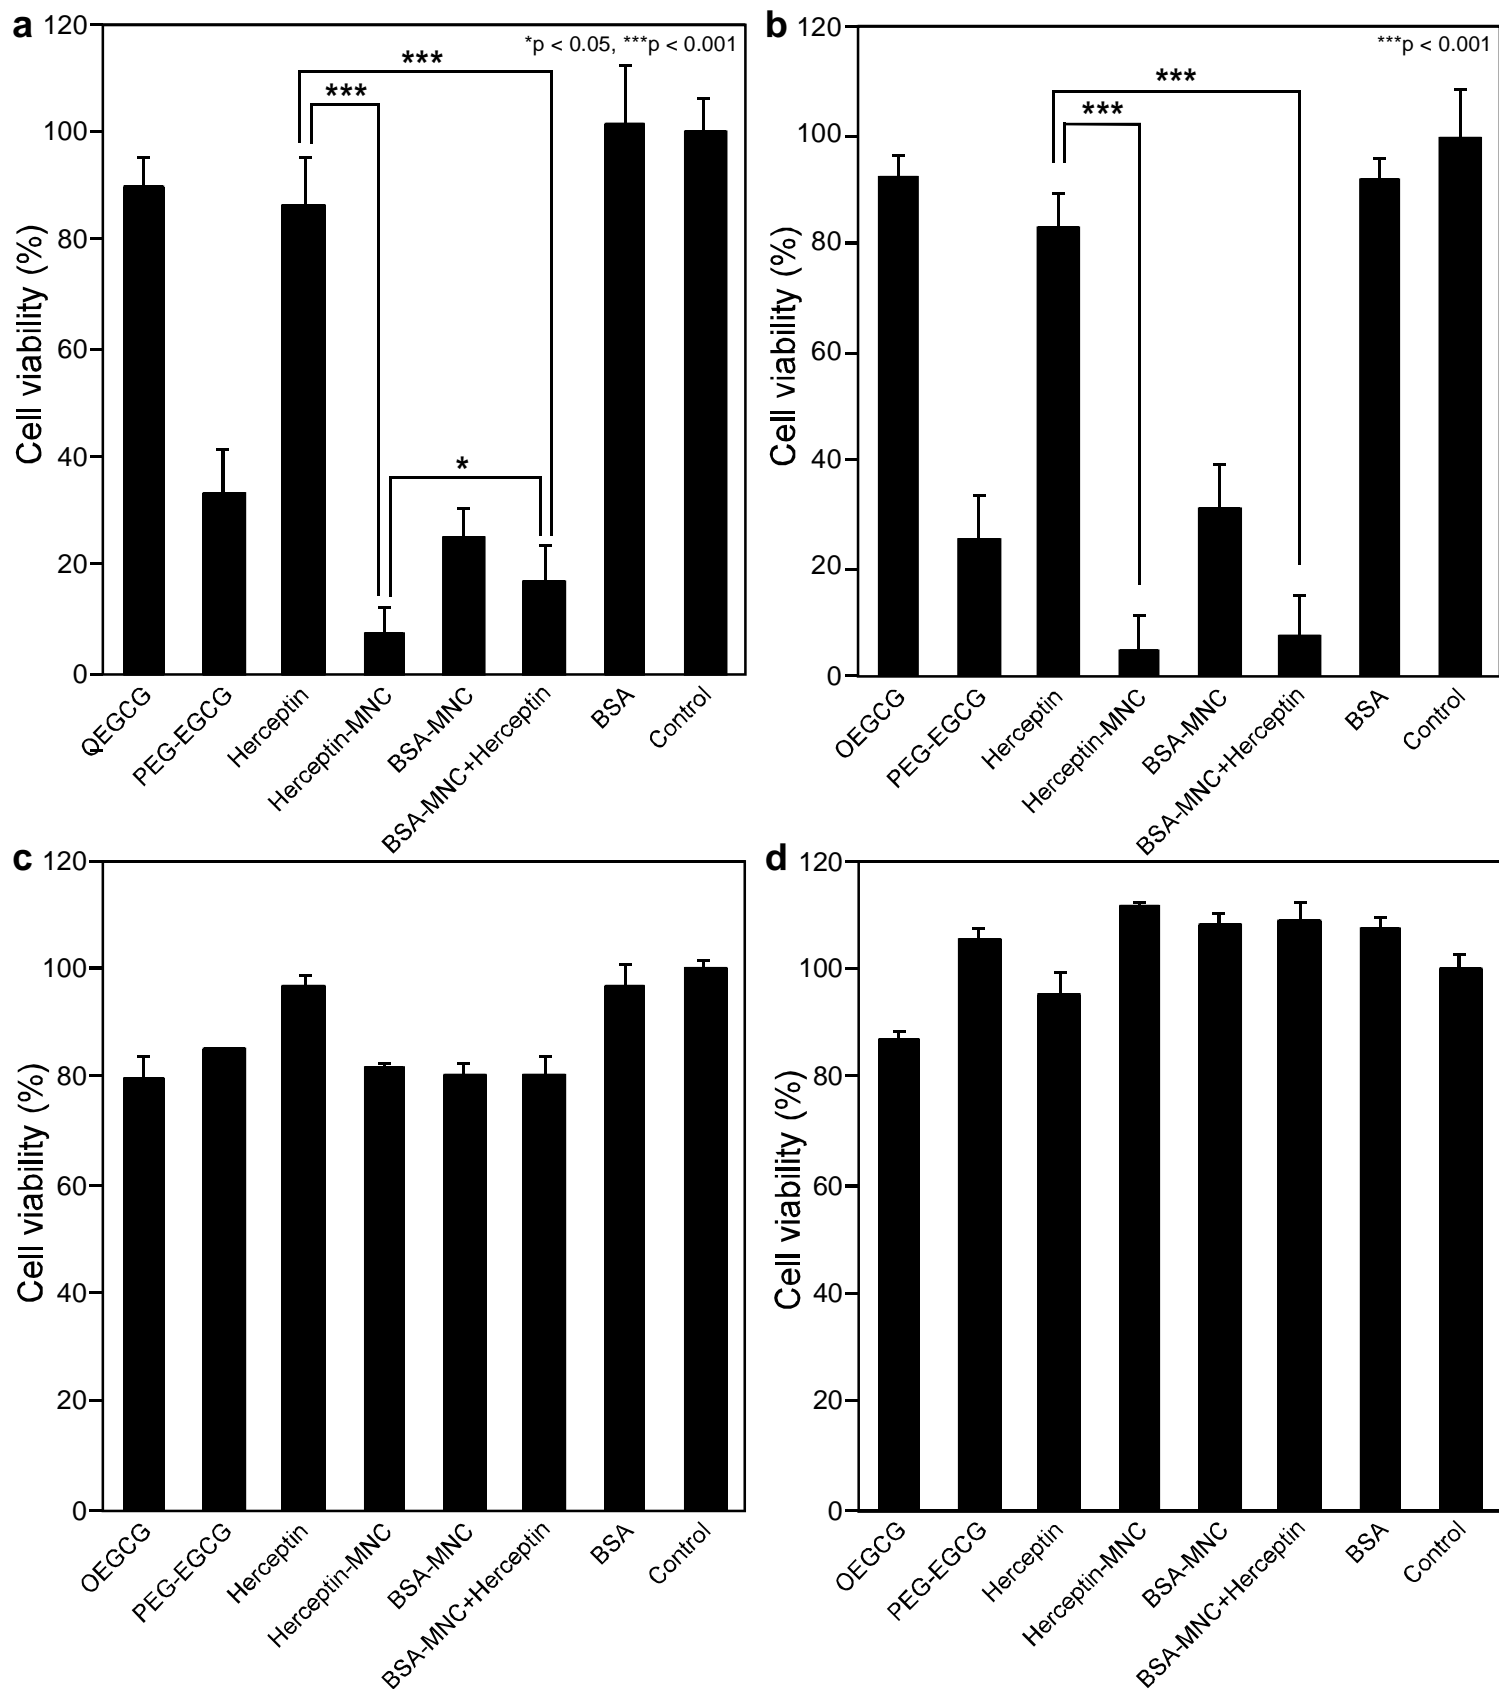

**Fig. S10 Cell growth inhibitory effect.** Effect on **a**, SKBR-3 (human breast cancer cells), **b**, SKOV-3 (human ovarian cancer cells), **c**, MCF-10A (human normal mammary epithelial cells) and **d**, HMEC (human normal mammary epithelial cells) by control (untreated), Herceptin ( $0.5 \text{ mg ml}^{-1}$ ), Herceptin-MNC (Herceptin/OEGCG/PEG-EGCG =  $0.5/0.024/0.26 \text{ mg ml}^{-1}$ ), BSA-MNC (drug-free carrier, with the equivalents), a mixture of BSA-MNC and Herceptin (with the equivalents), BSA (with the equivalent), OEGCG and PEG-EGCG (carrier components, with the equivalents),  $n = 5$  (mean  $\pm$  s.d.). \* $p < 0.05$ , \*\*\* $p < 0.001$ .

# Supplementary Fig. 11

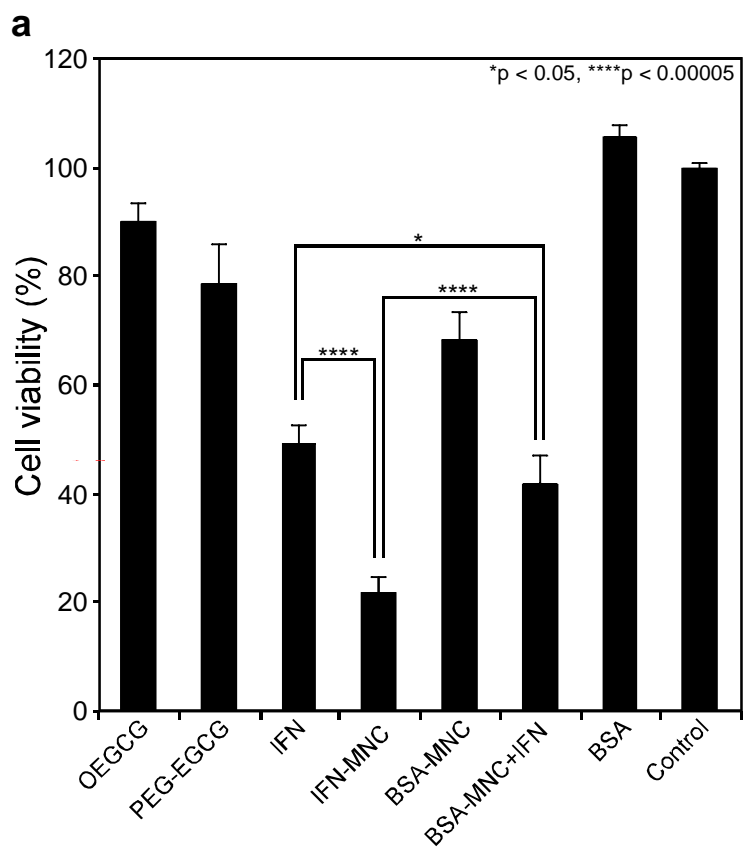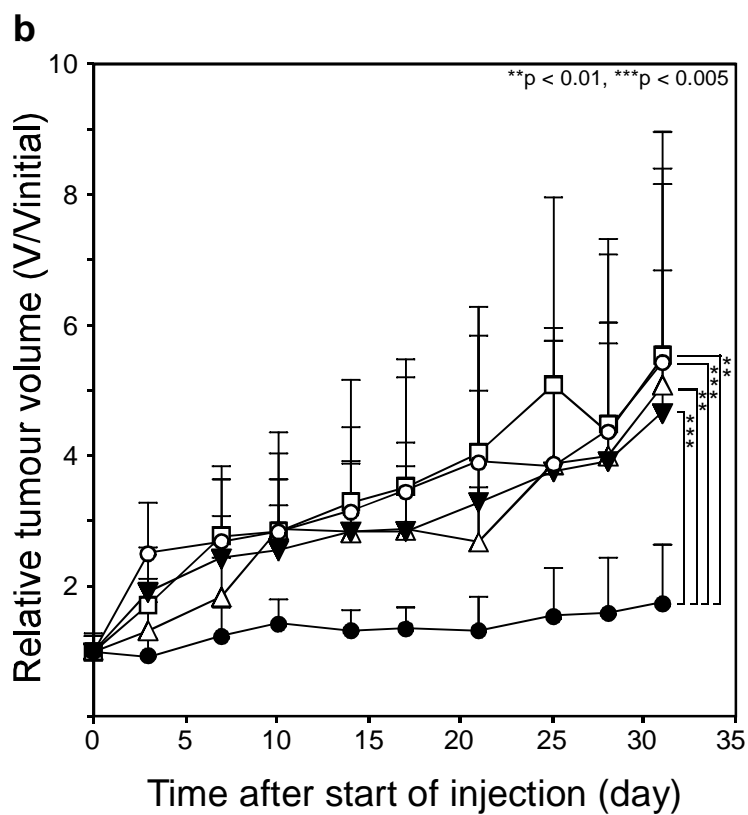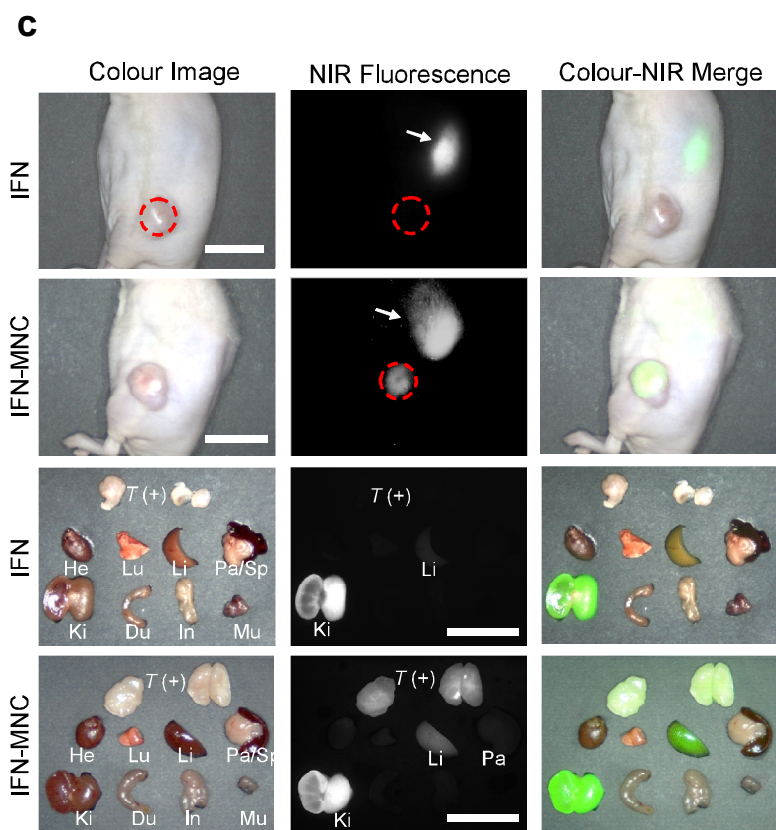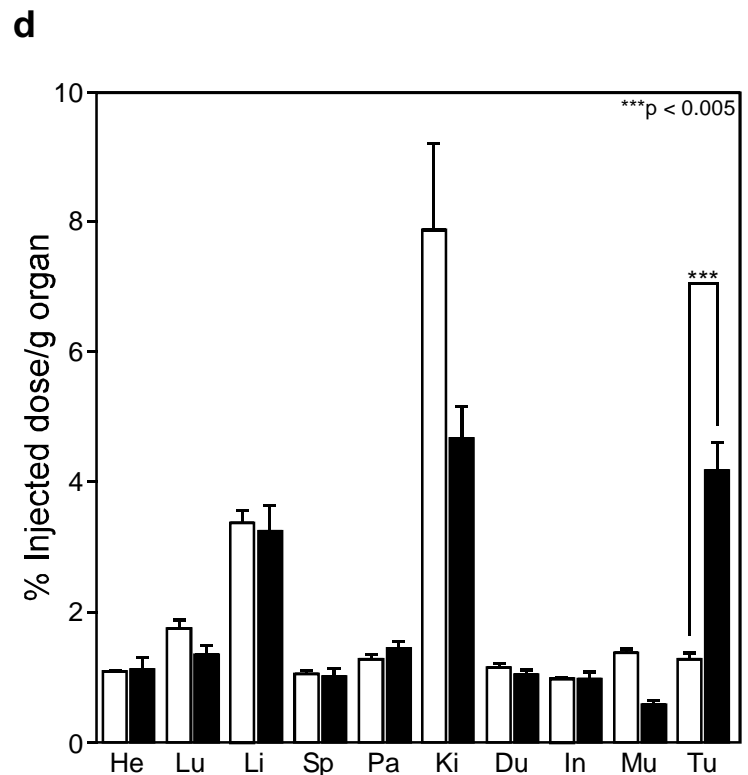

**Fig. S11 The anticancer effect and biodistribution of the IFN-MNC.** **a**, HAK-1B (human liver cancer cell line) growth inhibitory effects by control (untreated), IFN ( $0.020 \text{ mg ml}^{-1}$ ), IFN-MNC (IFN/OEGCG/PEG-EGCG =  $0.020/0.0049/0.78 \text{ mg ml}^{-1}$ ), BSA-MNC (drug-free carrier, with the equivalents), a mixture of BSA-MNC and IFN (with the equivalents), BSA (with the equivalent), OEGCG and PEG-EGCG (carrier components, with the equivalents),  $n = 5$  (mean  $\pm$  s.d.). \* $p < 0.05$ , \*\*\*\* $p < 0.00005$ . **b**, Anticancer effect on HAK-1B-xenografted nude mouse model. PBS (vehicle control, white circles), IFN ( $0.1 \text{ mg kg}^{-1}$ , white squares), BSA-MNC (white triangles), sequential injection of BSA-MNC and IFN (black inverted triangles) and IFN-MNC (black circles) in the same formulations used in Fig. S11a,  $n = 8-9$  (mean  $\pm$  s.d.). \*\* $p < 0.01$ , \*\*\* $p < 0.005$ . **c**, Real-time intraoperative tumour detection and biodistribution in major organ/tissue resected using NIR fluorescence. Shown are representative ( $n = 5$ ) images of colour video (left), NIR fluorescence (middle), and a pseudocoloured merge of the two (right) at 24 h post-injection. Arrows = non-specific uptake (liver, kidneys, intestine); red dotted circle = ROI; T (+), positive tumour; He, heart; Lu, lung; Li, liver; Pa, pancreas; Sp, spleen; Ki, kidneys; Du, duodenum; In, intestine; Mu, muscle. Scale bars = 1 cm. **d**, Biodistribution analysis by comparing CBR (contrast-to-background ratio) of resected organ/tissue. IFN (white bars), IFN-MNC (black bars),  $n = 5$  (mean  $\pm$  s.d.). \*\*\* $p < 0.005$ . All NIR fluorescence images have identical exposure times and normalization.

## Supplementary Fig. 12

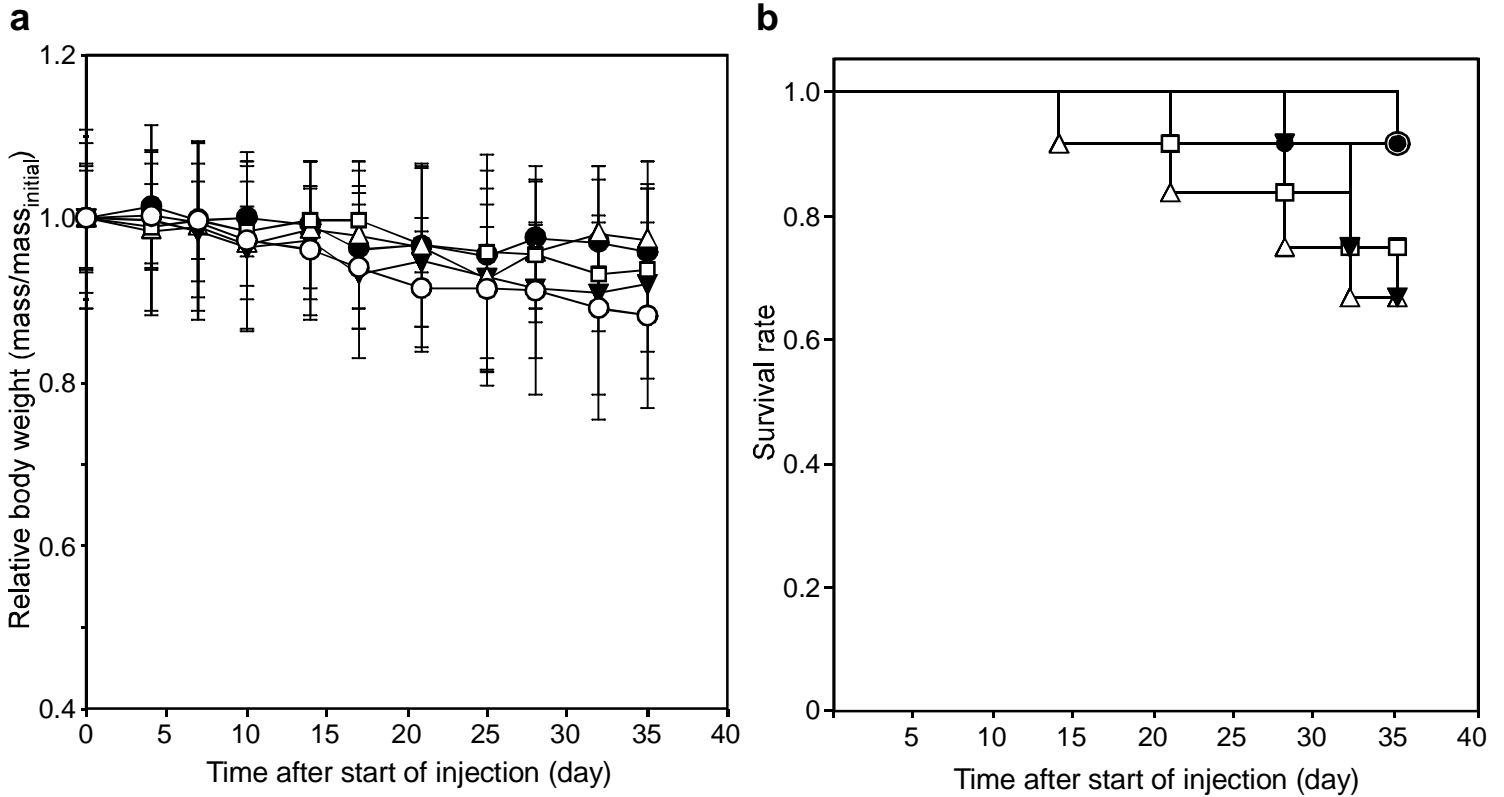

**Fig. S12 The body weight and survival rate upon treatment using Herceptin-MNC.** **a**, Relative body weight change of the BT-474 (human breast cancer cell line)-xenografted nude mouse during treatment,  $n = 12$  (mean  $\pm$  s.d.). Statistical analysis was performed by ANOVA. **b**, Mice survival rate during treatment. Comparisons between groups were made using a Kaplan-Meier analysis followed by the Log Rank Test. PBS (vehicle control, white circles), free Herceptin (white squares), BSA-MNC (drug-free carrier, white triangles), sequential injection of BSA-MNC and Herceptin (black inverted triangles), and Herceptin-MNC (black circles),  $n = 12$ .

## Supplementary Fig. 13

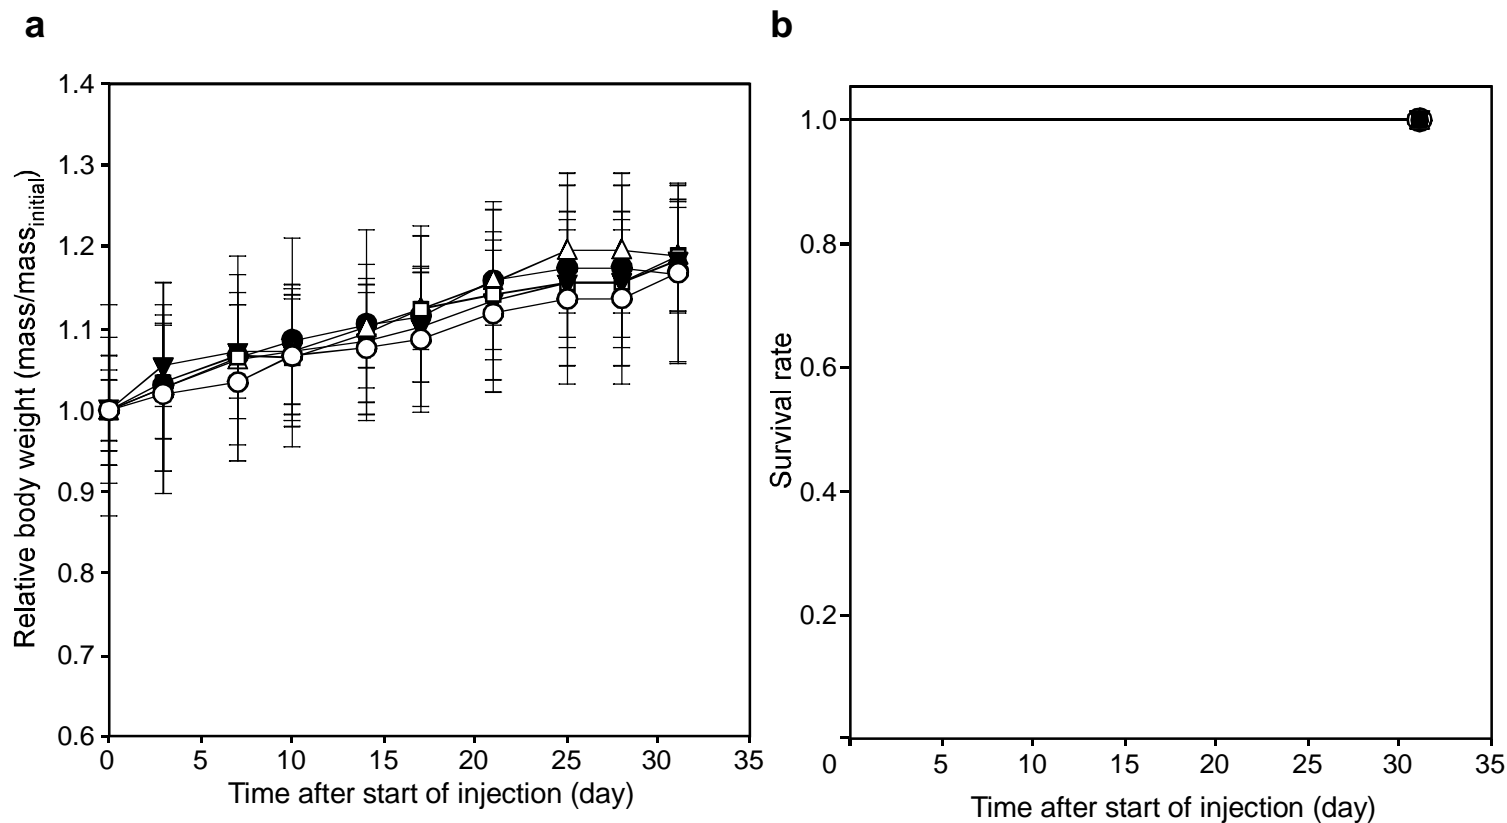

**Fig. S13 The body weight and survival rate upon treatment using IFN-MNC. a,** Relative body weight change of the HAK-1B (human liver cancer cell line)-xenografted nude mouse during treatment,  $n = 8-9$  (mean  $\pm$  s.d.) . **b,** Mice survival rate during treatment. Comparisons between groups were made using a Kaplan-Meier analysis followed by the Log Rank Test. PBS (vehicle control, white circles), IFN ( $0.1 \text{ mg kg}^{-1}$ , white squares), BSA-MNC (white triangles), sequential injection of BSA-MNC and IFN (black inverted triangles) and IFN-MNC (black circles),  $n = 8-9$ .

## Supplementary Fig. 14

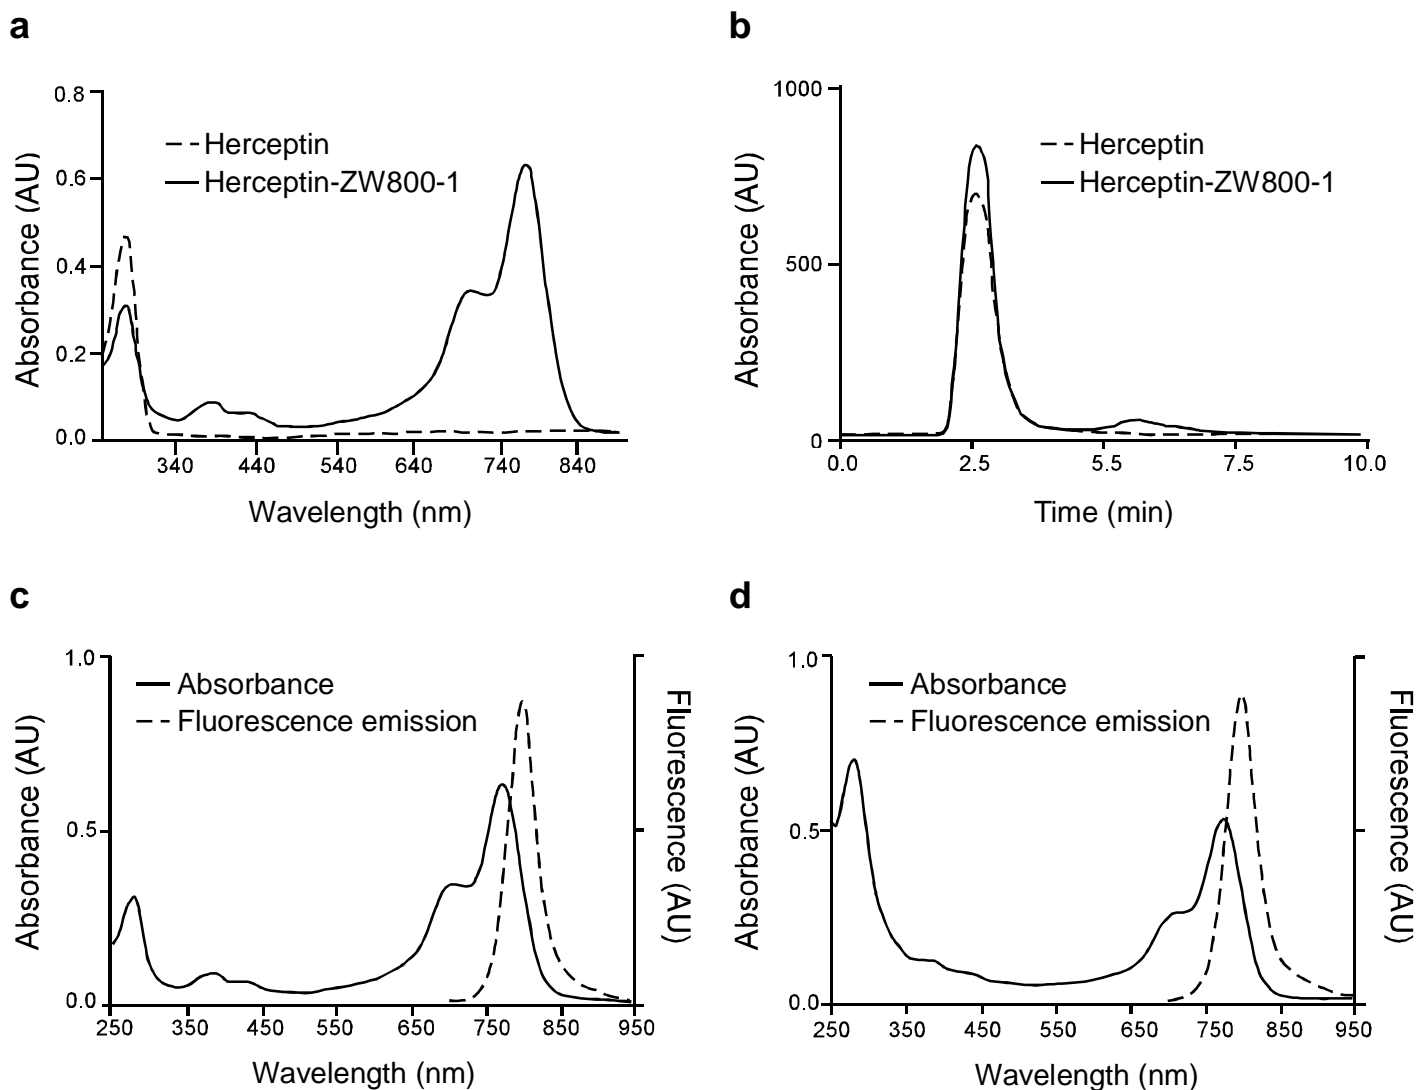

**Fig. S14 Bioconjugation of NIR Fluorophores to Herceptin.** **a**, Calculation of labeling ratio and **b**, GFC purification of Herceptin-ZW800-1. Absorbance and fluorescence emission spectra of **c**, Herceptin-ZW800-1 and **d**, Herceptin-ZW800-1-loaded micellar nanocomplex (Herceptin-ZW800-1-MNC) in PBS (pH 7.4).



## Supplementary Fig. S15

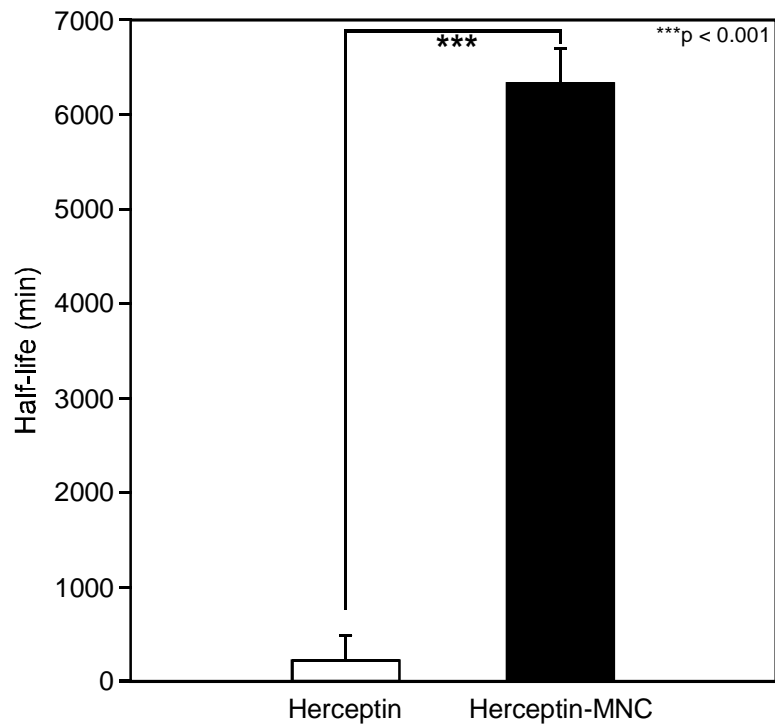

**Fig. S15 Blood half-life of NIR fluorophore-labeled Herceptin and Herceptin-MNC.**  
n = 5 (mean  $\pm$  s.d.), \*\*\*p < 0.001.

## Supplementary Fig. S16

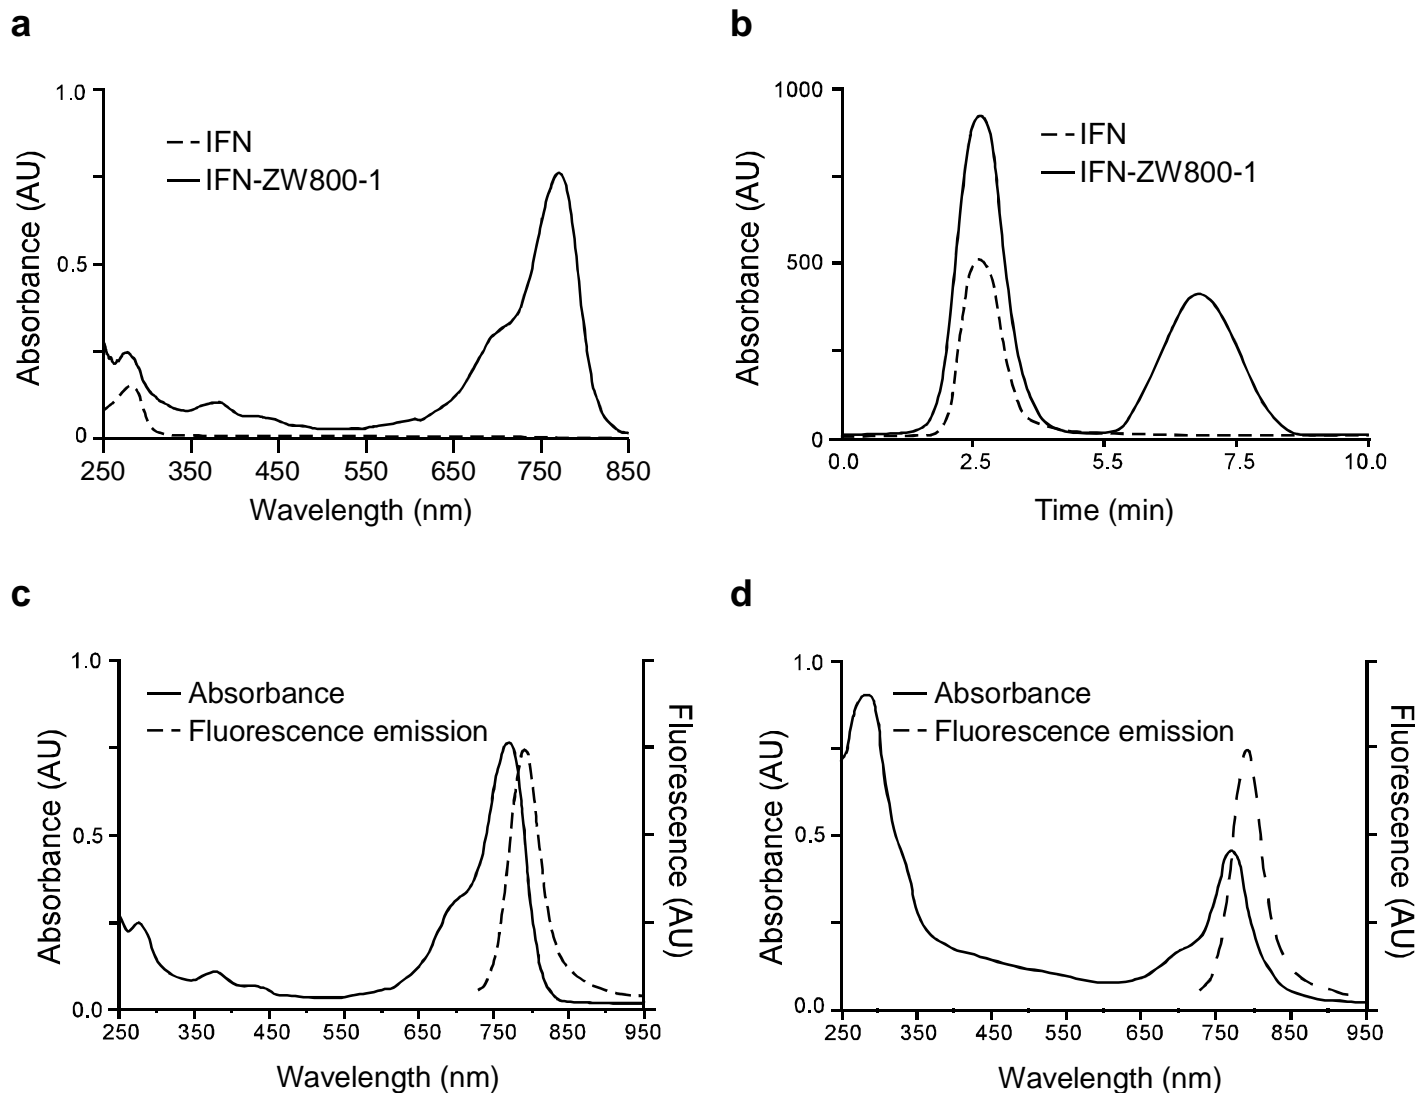

**Fig. S16 Bioconjugation of NIR Fluorophores to IFN.** **a**, Calculation of labeling ratio and **b**, GFC purification of IFN-ZW800-1. Absorbance and fluorescence emission spectra of **c**, IFN-ZW800-1 and **d**, IFN-ZW800-1-loaded micellar nanocomplex (IFN-ZW800-1-MNC) in PBS (pH 7.4).

## Supplementary Fig. S17

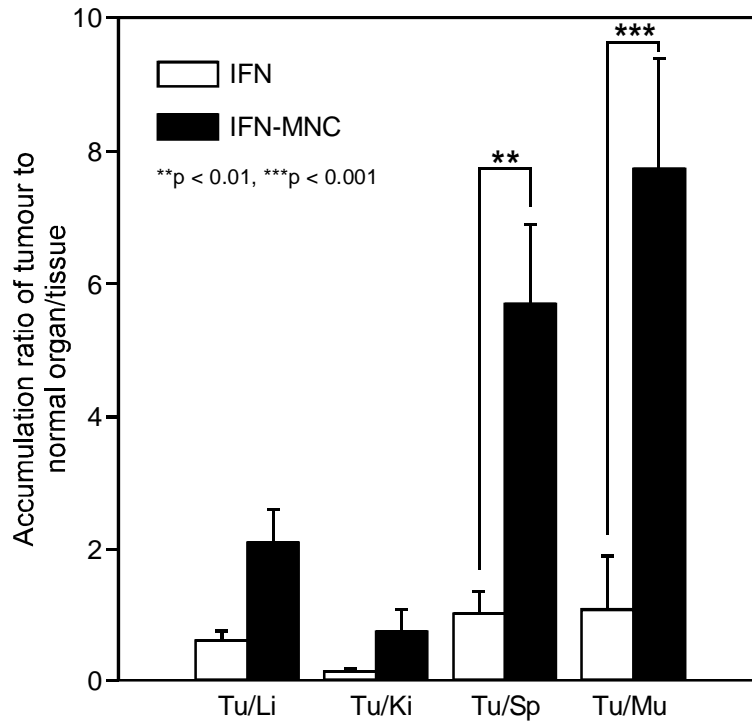

**Fig. S17 Accumulation ratios of the tumour to normal organ/tissue for IFN (white bars) and IFN-MNC (black bars).**  $n = 5$  (mean  $\pm$  s.d.), \*\* $p < 0.01$ , \*\*\* $p < 0.001$ . Tu, tumour; Li, liver; Ki, kidney; Sp, spleen; Mu, muscle.

## Supplementary Fig. S18

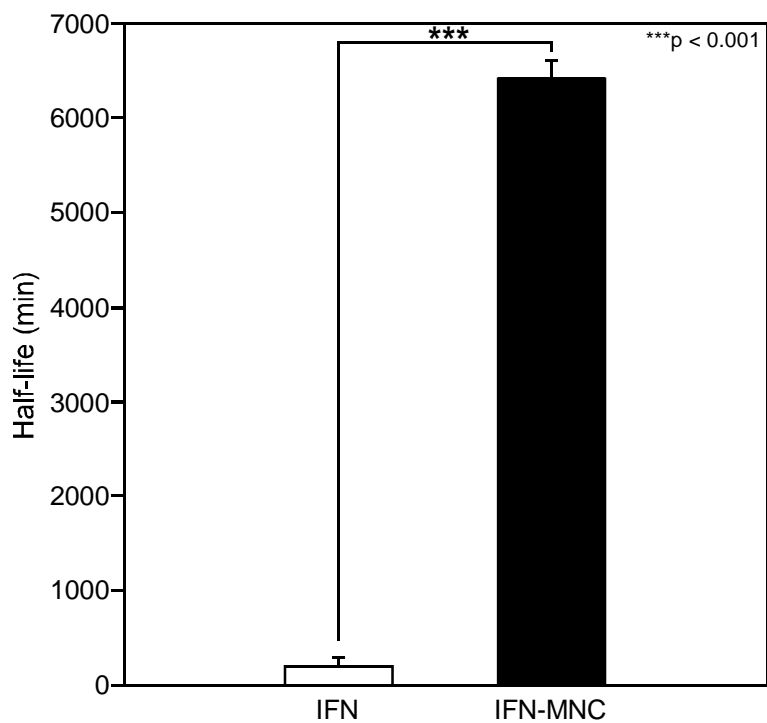

**Fig. S18 Blood half-life of NIR fluorophore-labeled IFN and IFN-MNC.**  $n = 5$  (mean  $\pm$  s.d.), \*\*\* $p < 0.001$ .
